# Supplementary material for: Studying Three Abstract Artists Based on a Multiplex Network Knowledge Representation
Source: Hindawi journal article supplement (doi:10.1155/2021/8506571), 2021-01-01
Supplement: f1 [file 8506571.f1.docx]

## Supplementary Materials

*S2.1.1. Internal Representation – Region Information Vector Description*:

For every region component description, we are assuming a maximum of 20 regions. We use equations presented in section *2.* (*Materials and Methods*).

: , ), , , , ), ), ), ), ), , , , , , , ,, , , , , , , , , , , , , , , , , , , , , , , , , , , , ,

: , ), , , , ), ), , , , , , , , , , , , , , , , , , ,

: , ), , , , ), ), , , , , ,

: , ), ,

:

: ), )

: ), ), ), , ,

: , , , , , , , , , , , , ,

: , , , , , ,,

: , , , , ,

: , , , , ,

where the name of the functions corresponds to the procedure applied to get the final value.

*S2.1.2. Internal Representation – Relation Information Vector Description*:

For every relation component description, we are assuming a maximum of 190 binary relations calculated over the complete graph. We use equations presented in section *2.* (*Materials and Methods*).

: , , , , ), ), ), , , , , , , ,

: , , , , , , , , ,

: , , , , ), ), )

: ,

:

:

:

:

:

:

:

:

:

:

:

:

:

where the name of the functions corresponds to the procedure applied to get the final value.

*S3.1. Creativity Implication Network Scores. C*omparison of creativity scores when originality and influence change weights.

(b)


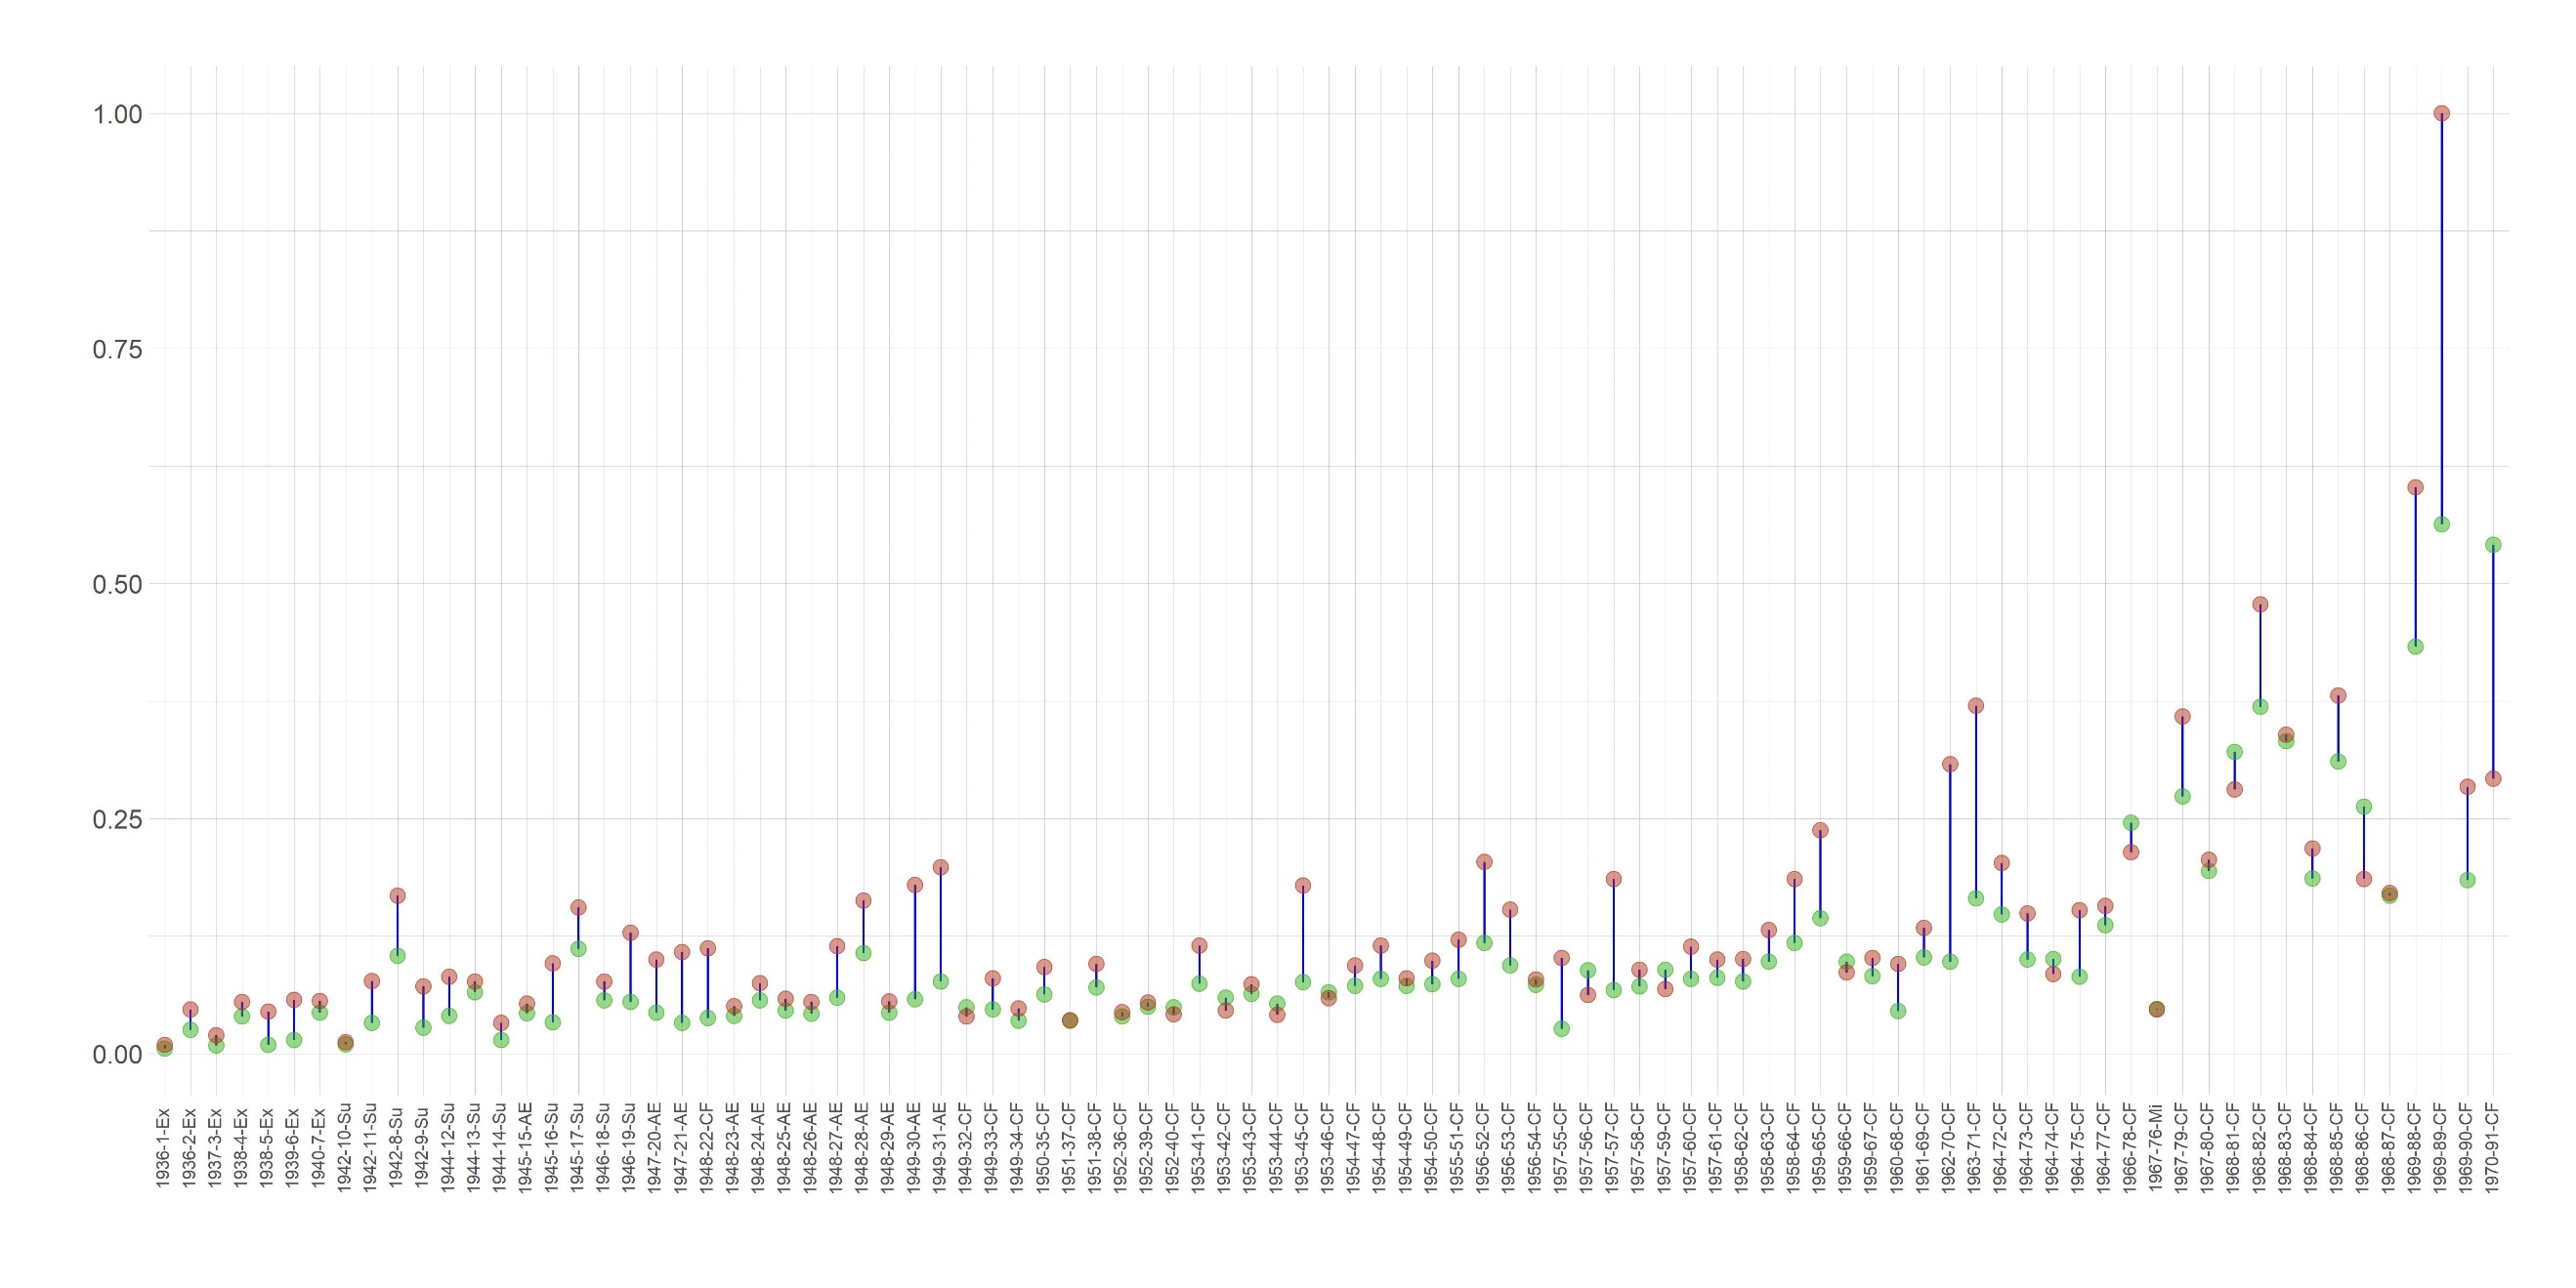


Figure S3.1: network based on . Visualization of 91 paintings by Mark Rothko colored by artistic style and creativity calculated using two different datasets. (a) shows creativity scores with parameter . In this case, influence is given 90% of the weight in the calculation of the score. (b) just as previous image, , originality is given 90% of the weight.

(a)


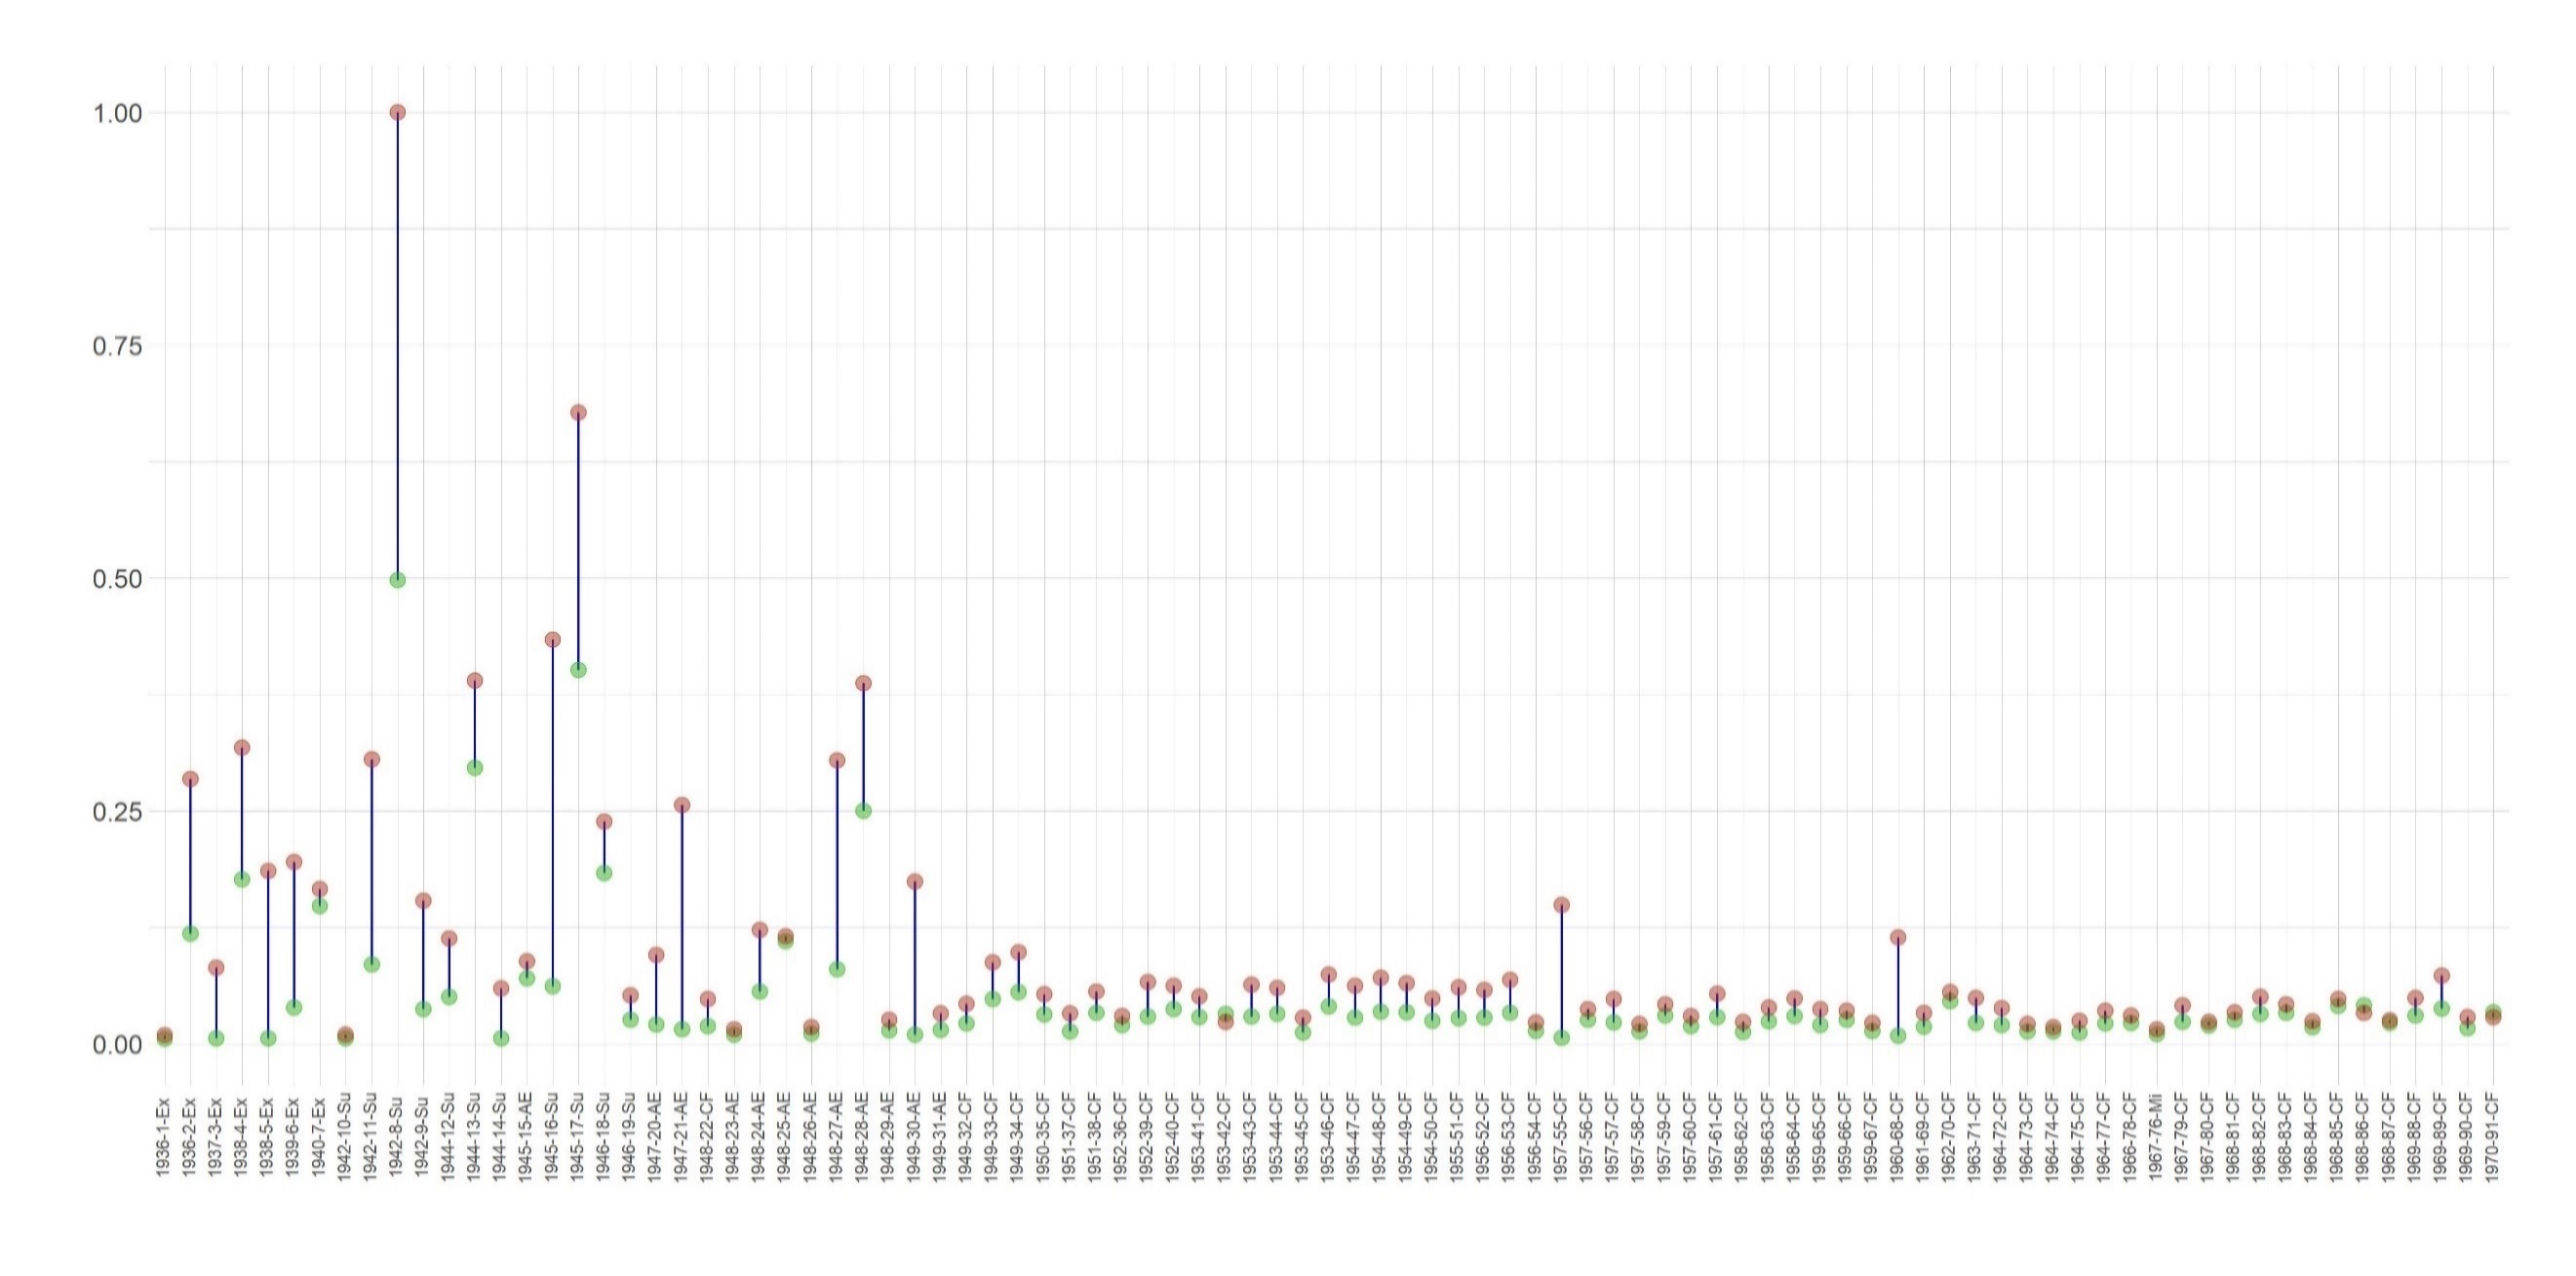


*S3.2. Creativity Scores of layers of Multiplex.* Figure S.3.2 shows additional creativity scores of layers of out multiplex based on for . Every network layout is ordered by year of creation and colored by style and node size represent creativity scores.


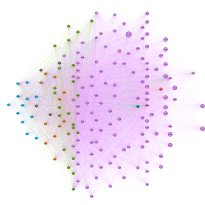

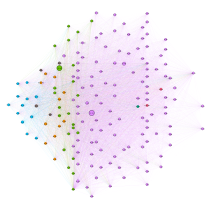

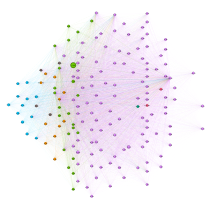


(d)

(e)

(f)


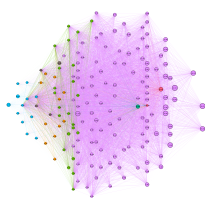

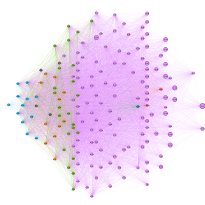

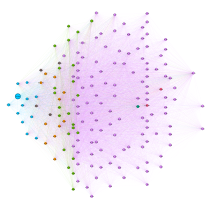


(g)

(i)

(j)

(v)

(w)


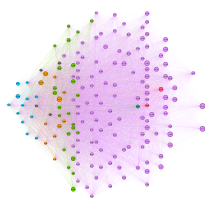

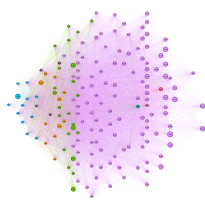


Figure S.3.2: Layers of Multiplex based on for i=6, …, 28. Creativity scores in terms of size of nodes (d) ( shows the binary normalized aspect ratio contrast characteristics. (e) ( shows the binary normalized weighted orientation contrast histogram characteristics. (f) ( shows the binary HUE (RYB color space) contrast characteristics. (g) ( shows the binary lightness contrast characteristics. (i) ( shows the binary color weight contrast characteristics. (j) ( shows the binary saturation contrast characteristics. (l) ( shows the binary lightness color palette contrast characteristics. (m) ( shows the binary color temperature color palette contrast characteristics. (r) ( shows x and y normalized coordinates characteristics of regions. (s) ( shows major and minor axis and other characteristics of regions. (t) ( shows orientation histogram characteristics of regions. (u) ( shows eccentricity, solidity, perimeter and other characteristics of regions. (v) ( shows color characteristics of regions. (w) ( shows color palette characteristics of regions.


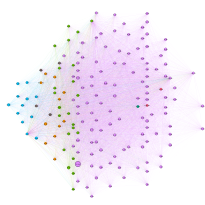

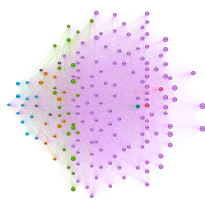

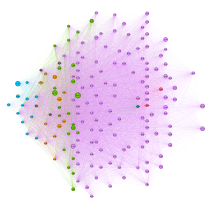


(s)

(t)

(u)


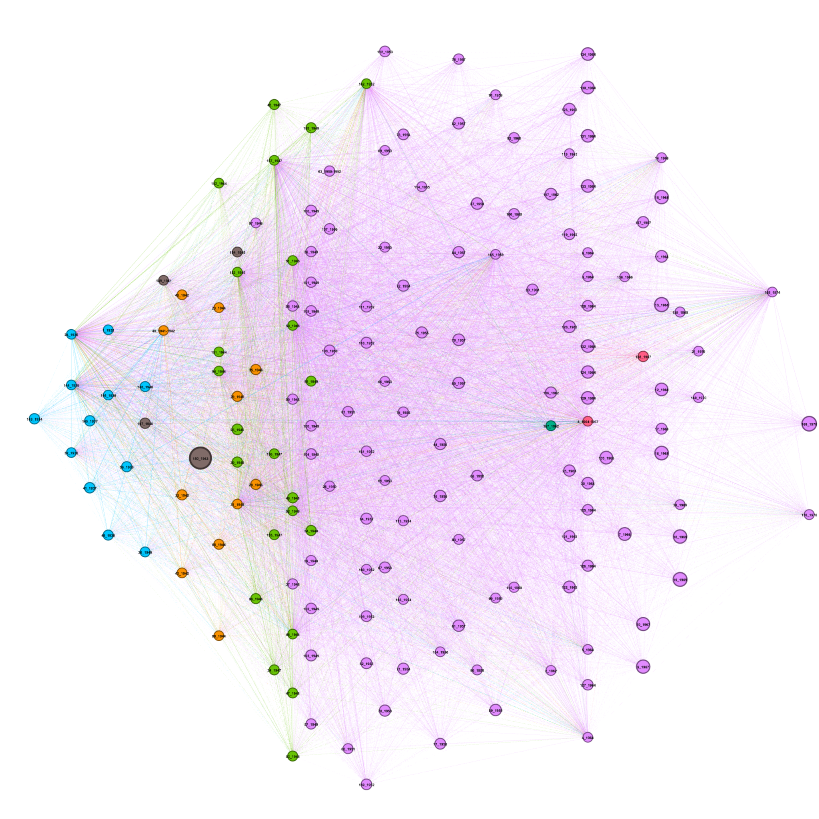

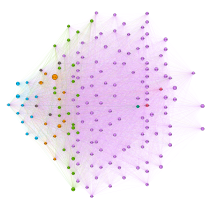

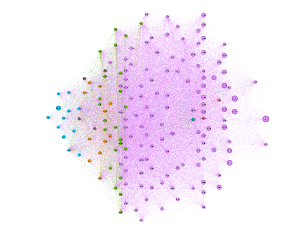


(l)

(m)

(r)

## Figure S.3.2.1 shows the time series of creativity scores based on network for Color Field Painting art works using a parameter value of 0.1.


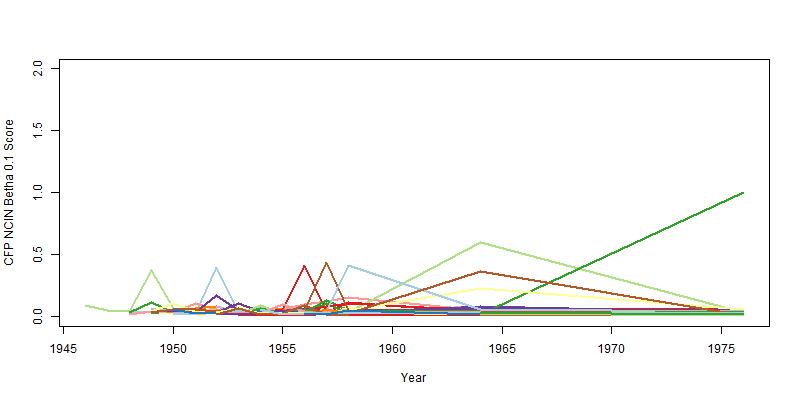


(a)

Figure S.3.2.1: Time series of creativity scores based on network for Color Field Painting art works using , 90% of weight on influence. (a) Barnett Newman – *Moment* (1946). (b) Mark Rothko – *Untitled* (1948). (c) Barnett Newman – *By Tows* (1949). (d) Mark Rothko – *Untitled* (1949). (e) Barnett Newman – *Untitled 3* (1949). (f) Barnett Newman - *Vir heroicus sublimis* (1950-1951). (g) Barnett Newman – *Moment* (1946). (h) Clyfford Still – *Untitled* (1951-1952). (i) Barnett Newman – *Galaxy* (1949).

(b)

(c)

(d)

(e)

(f)

(g)

(h)

(i)


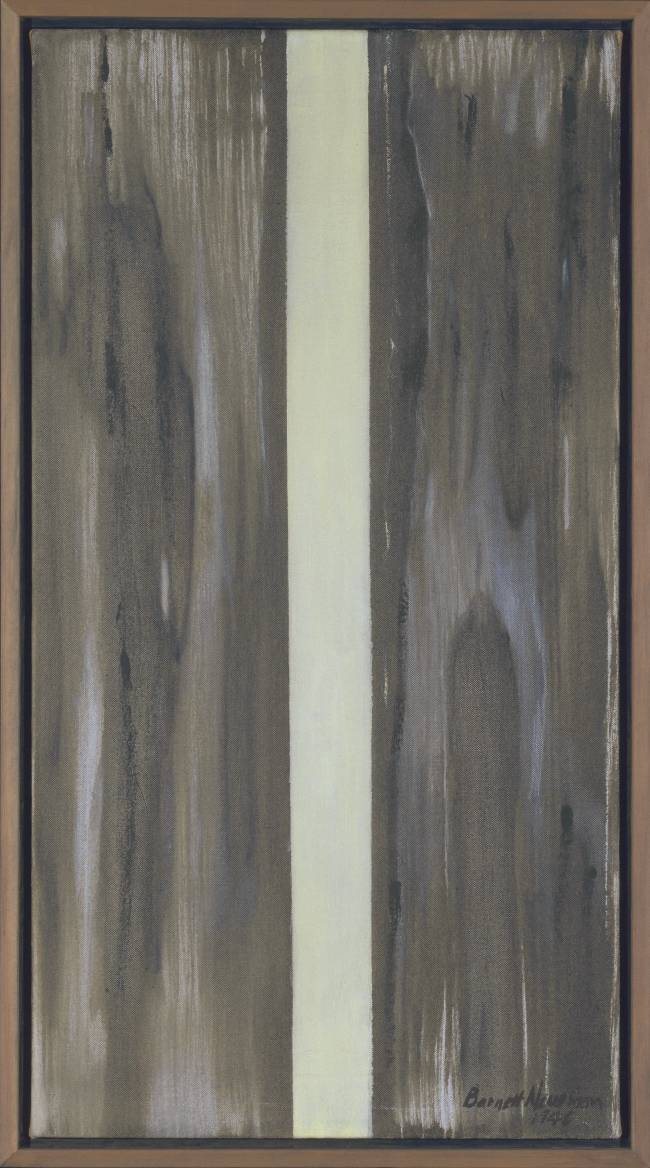

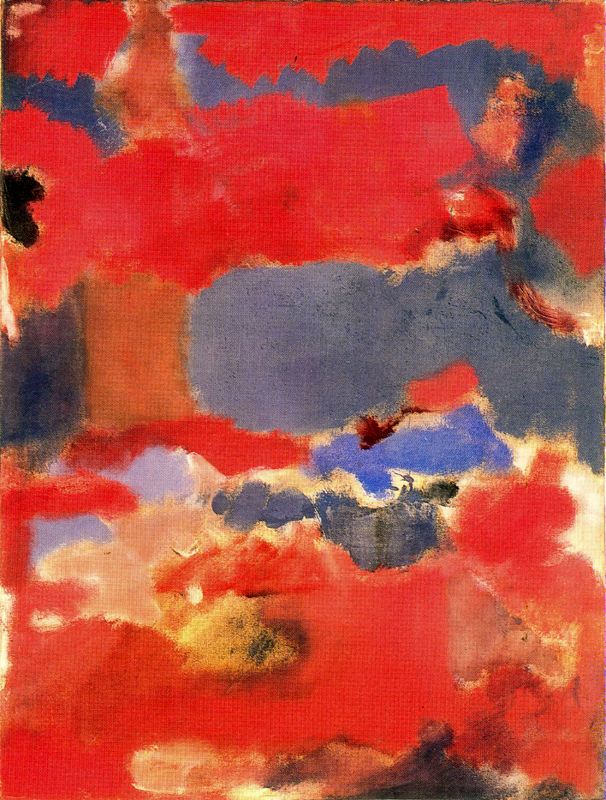

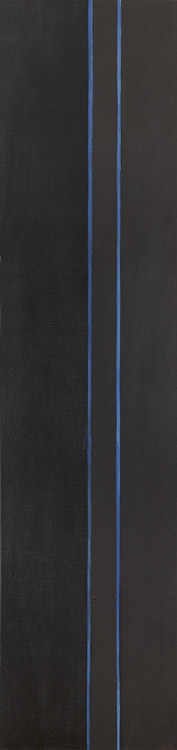

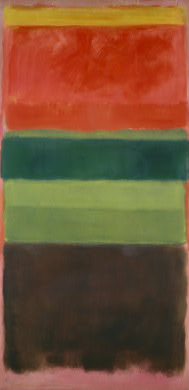

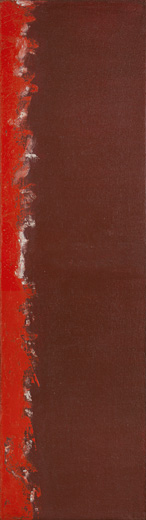

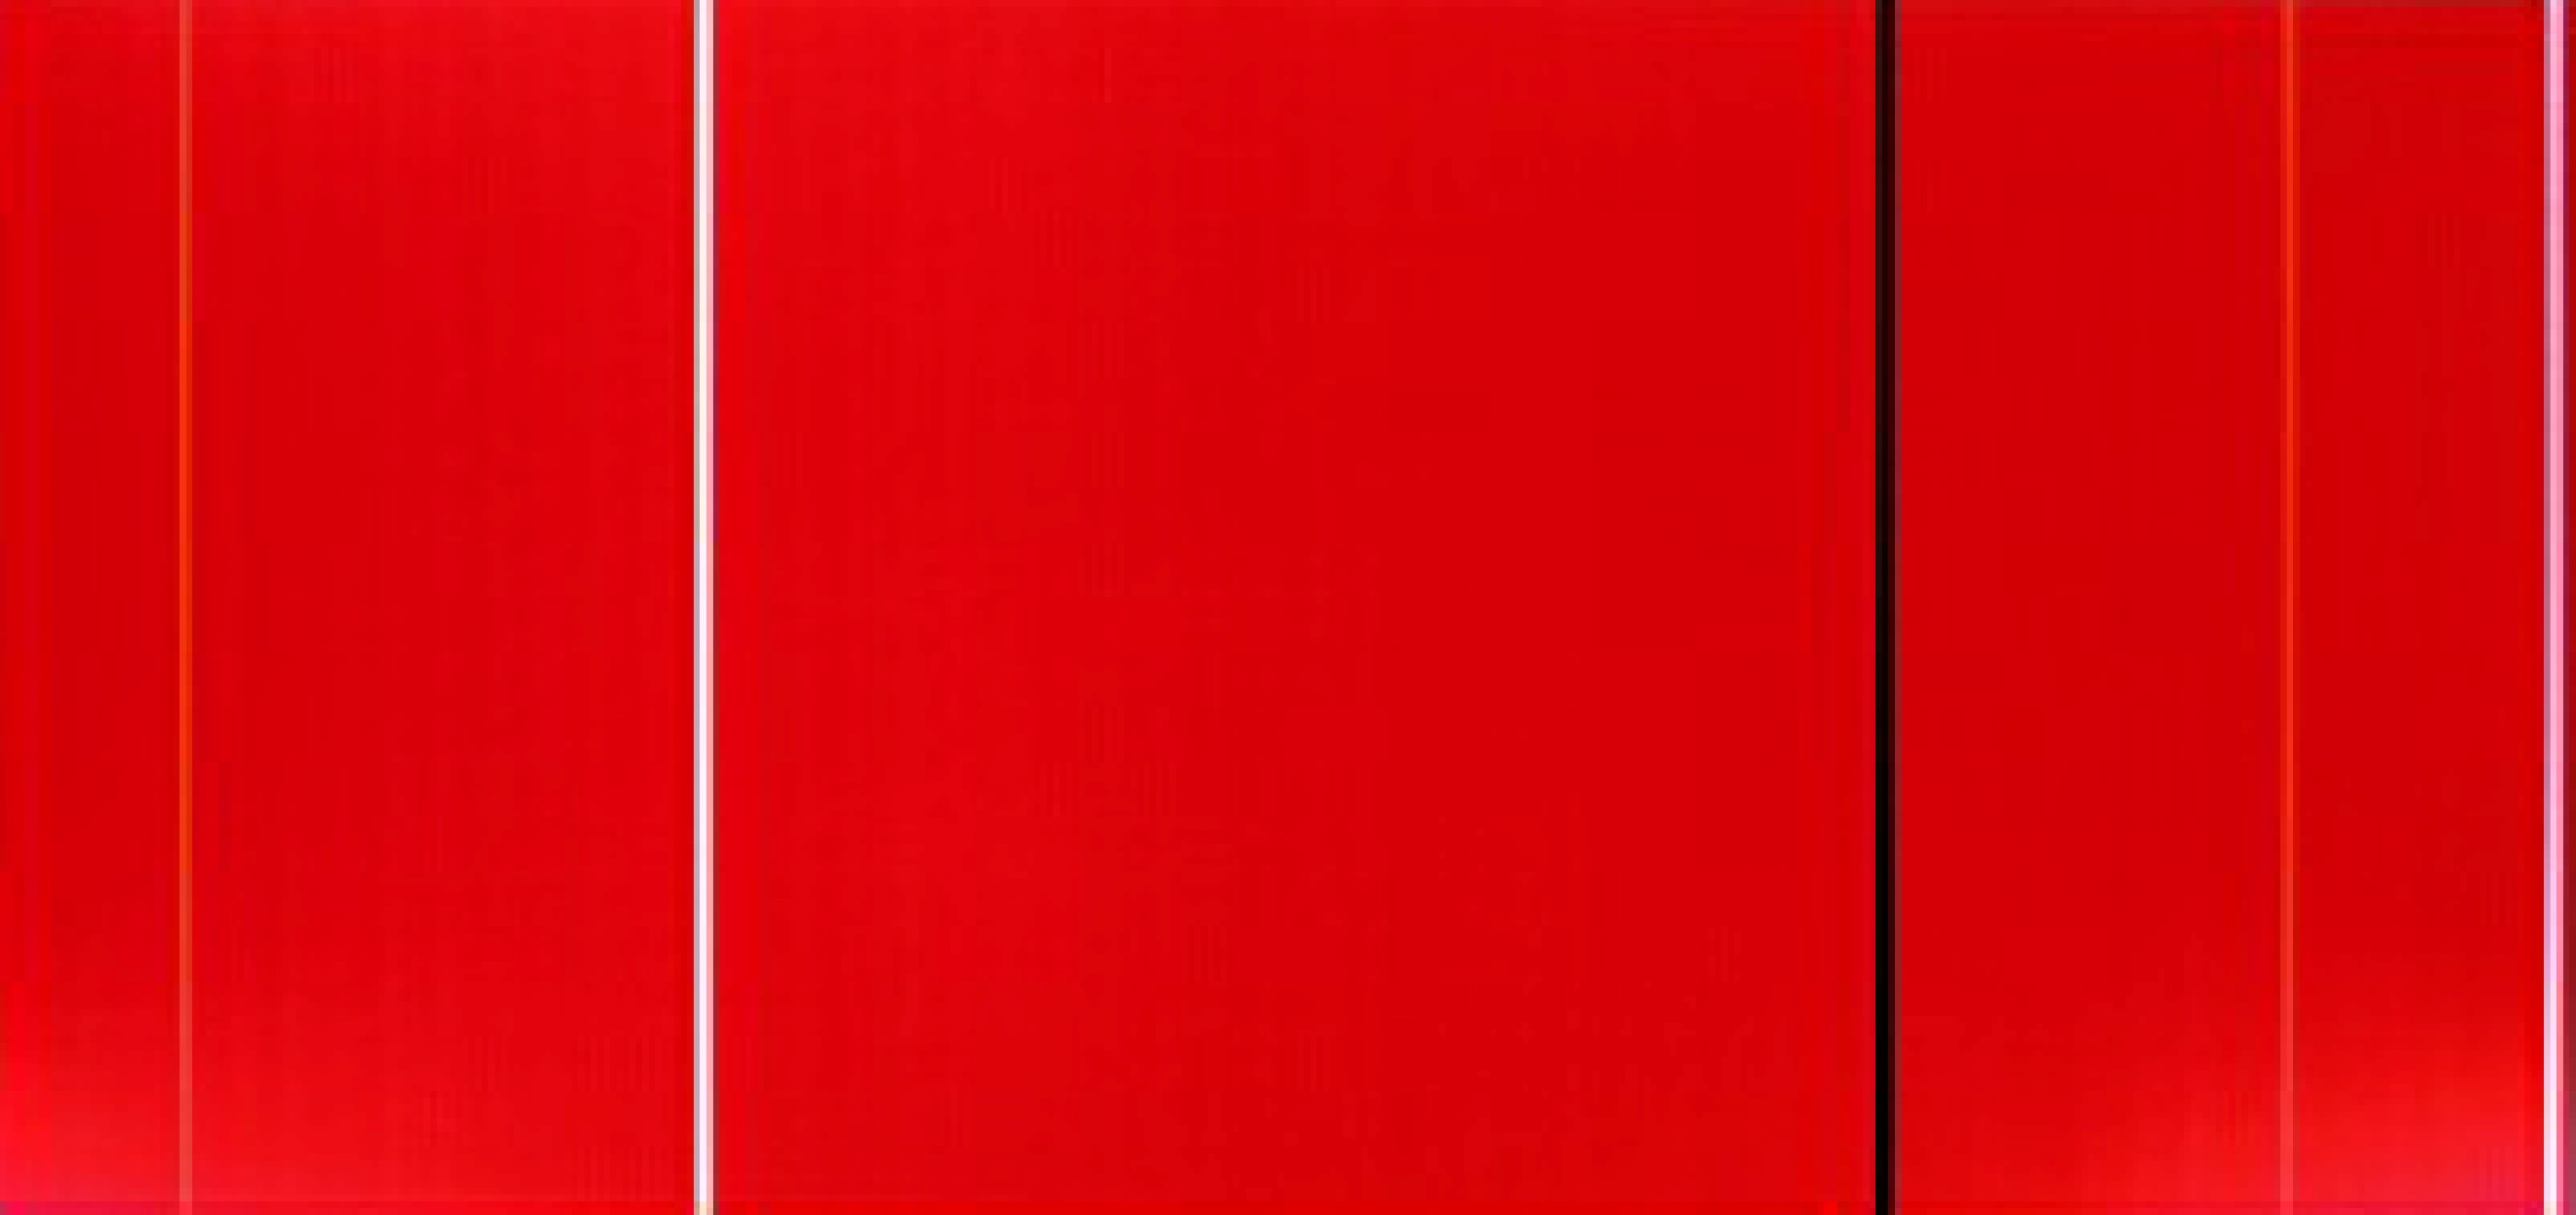

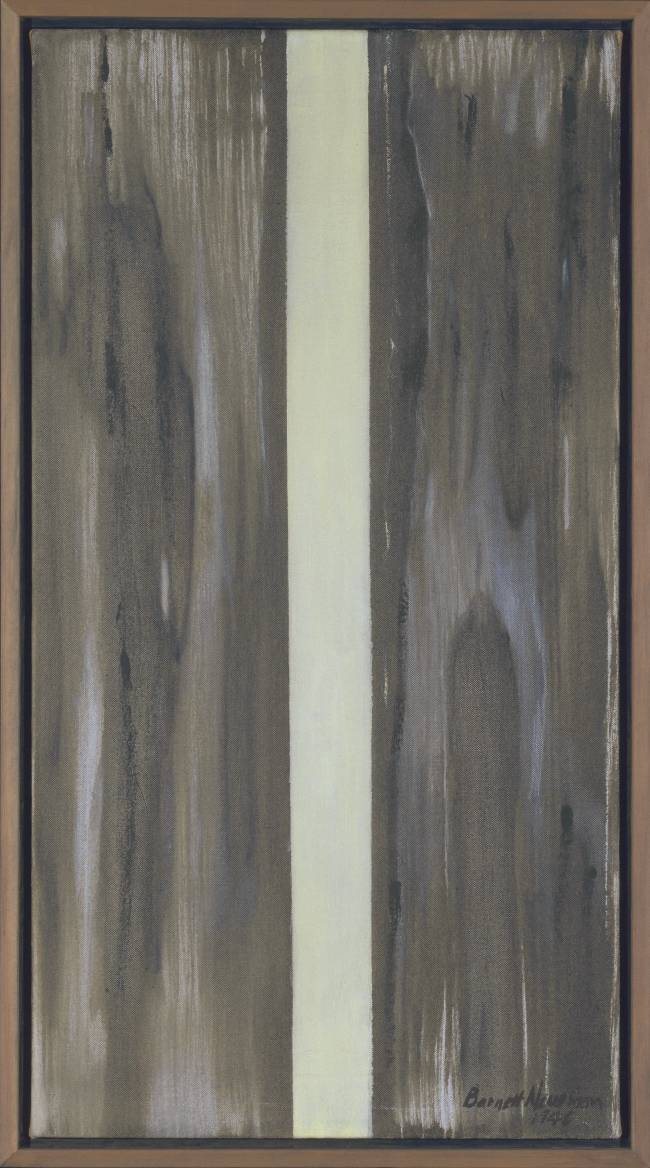

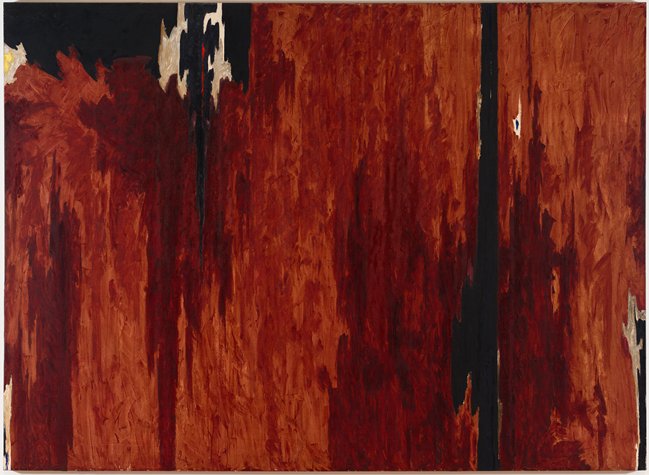

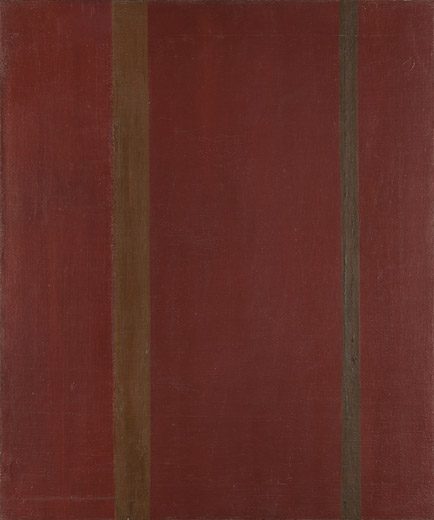


## Figure S.3.2.2 shows the time series of creativity scores based on network for Color Field Painting art works using a parameter value of 0.1.


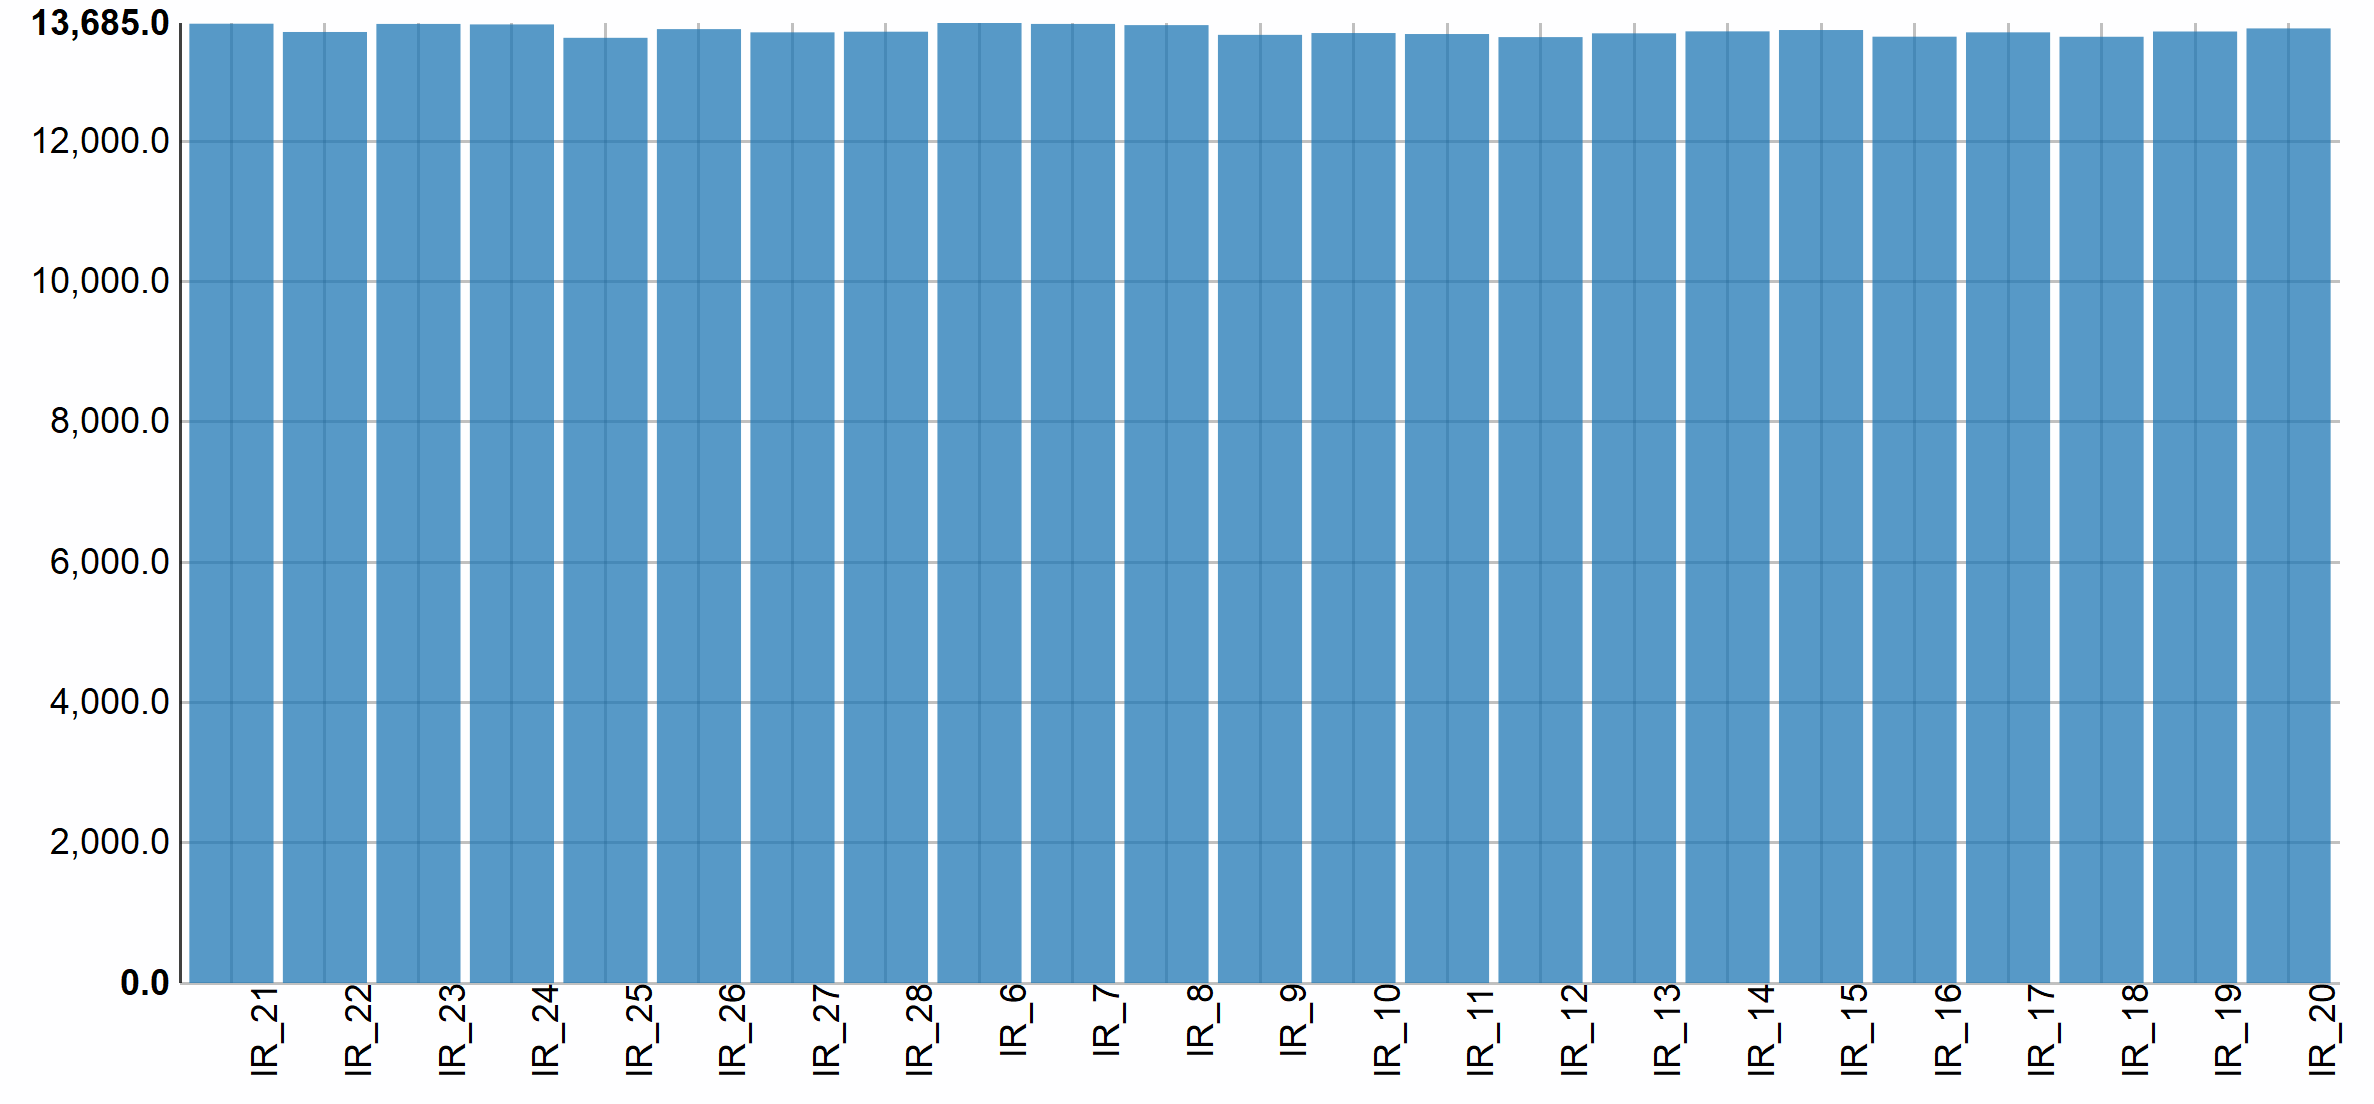


(a)

(b)


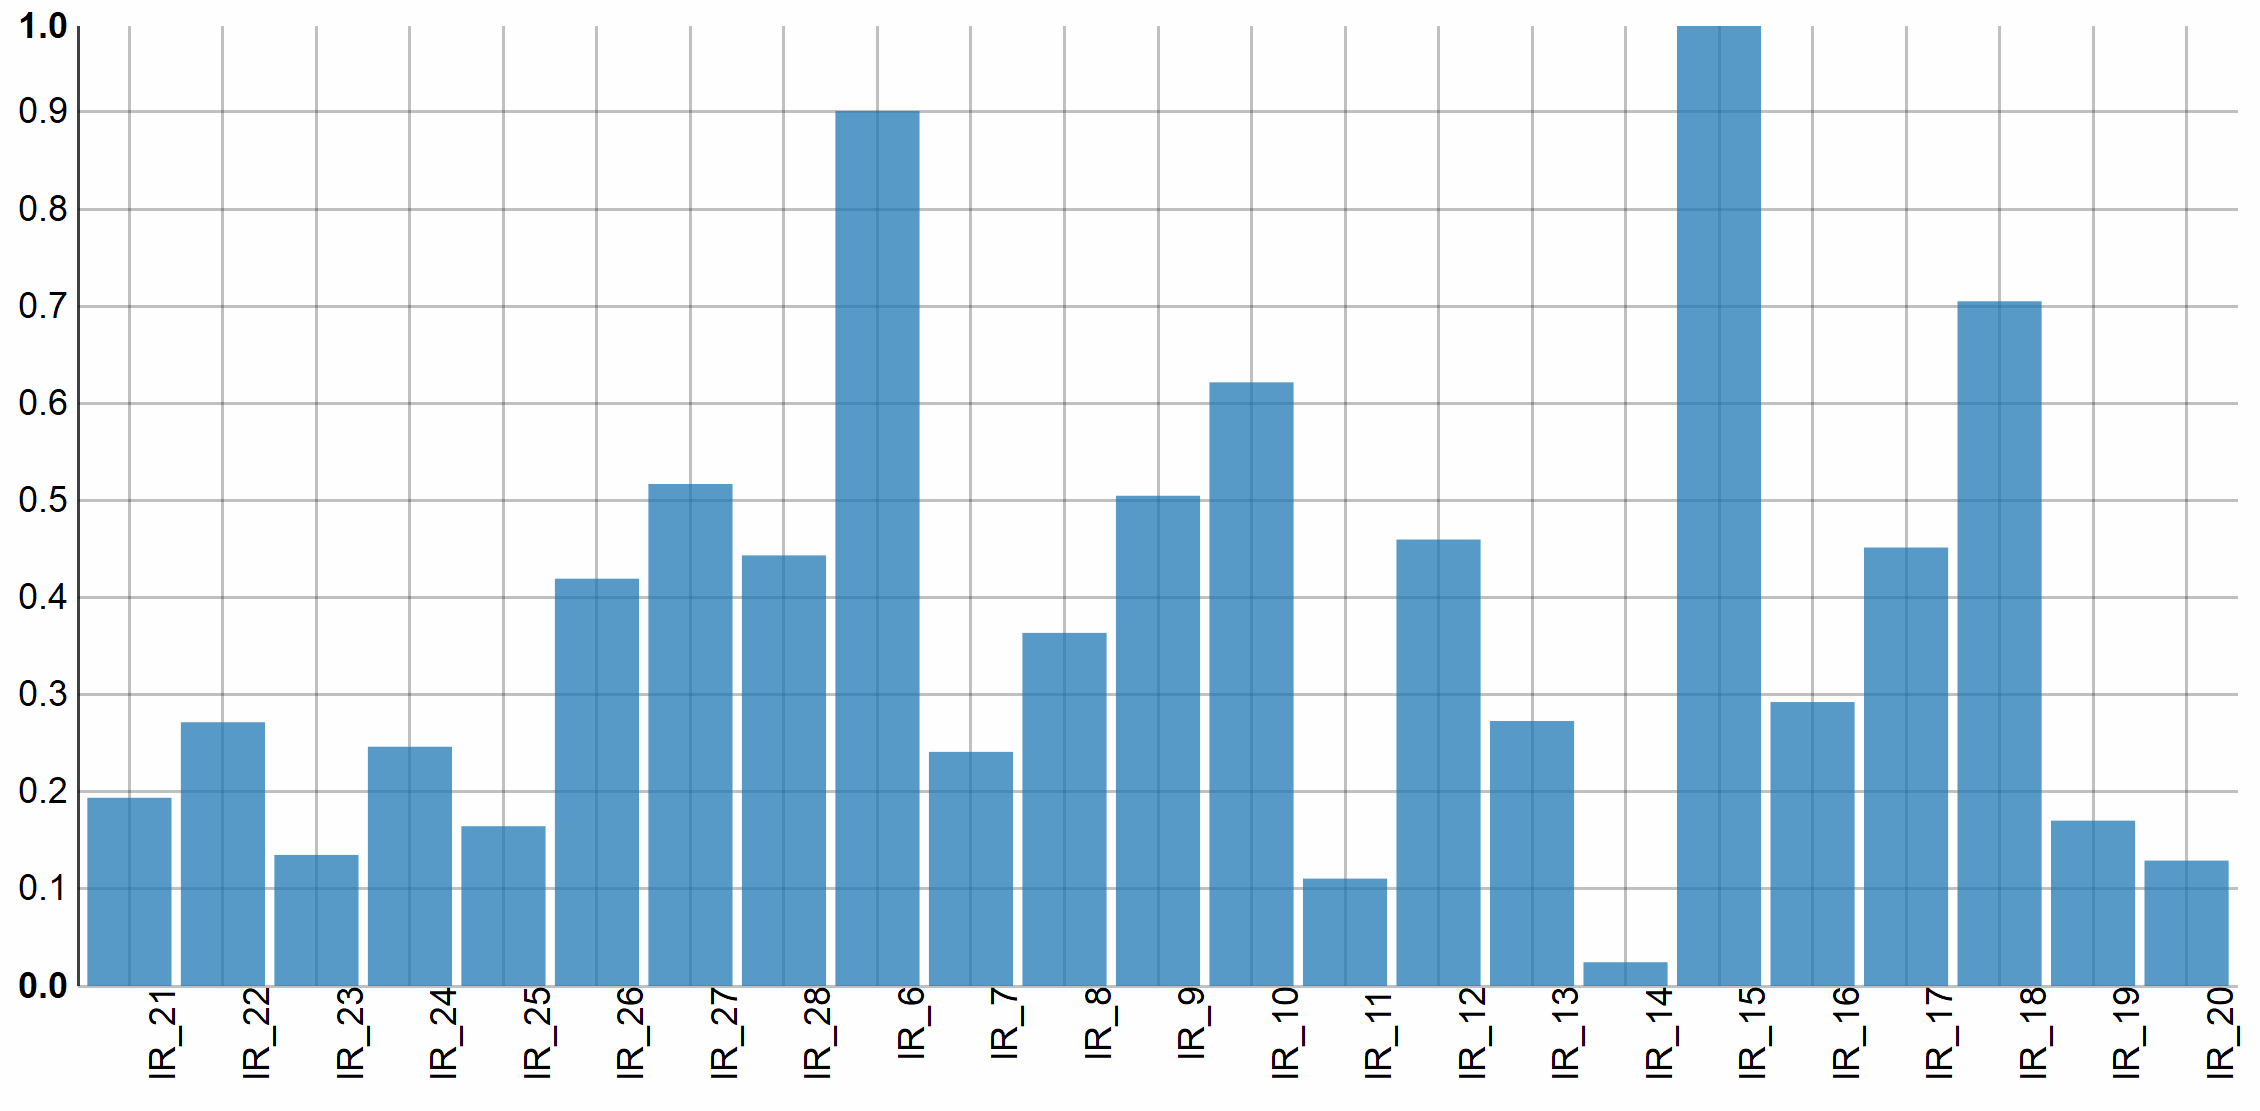


Figure S.3.2.2: Analysis done using [43] (a) number of edges per layer. (b) density per layer. (c) edge overlapping per layer correlation.


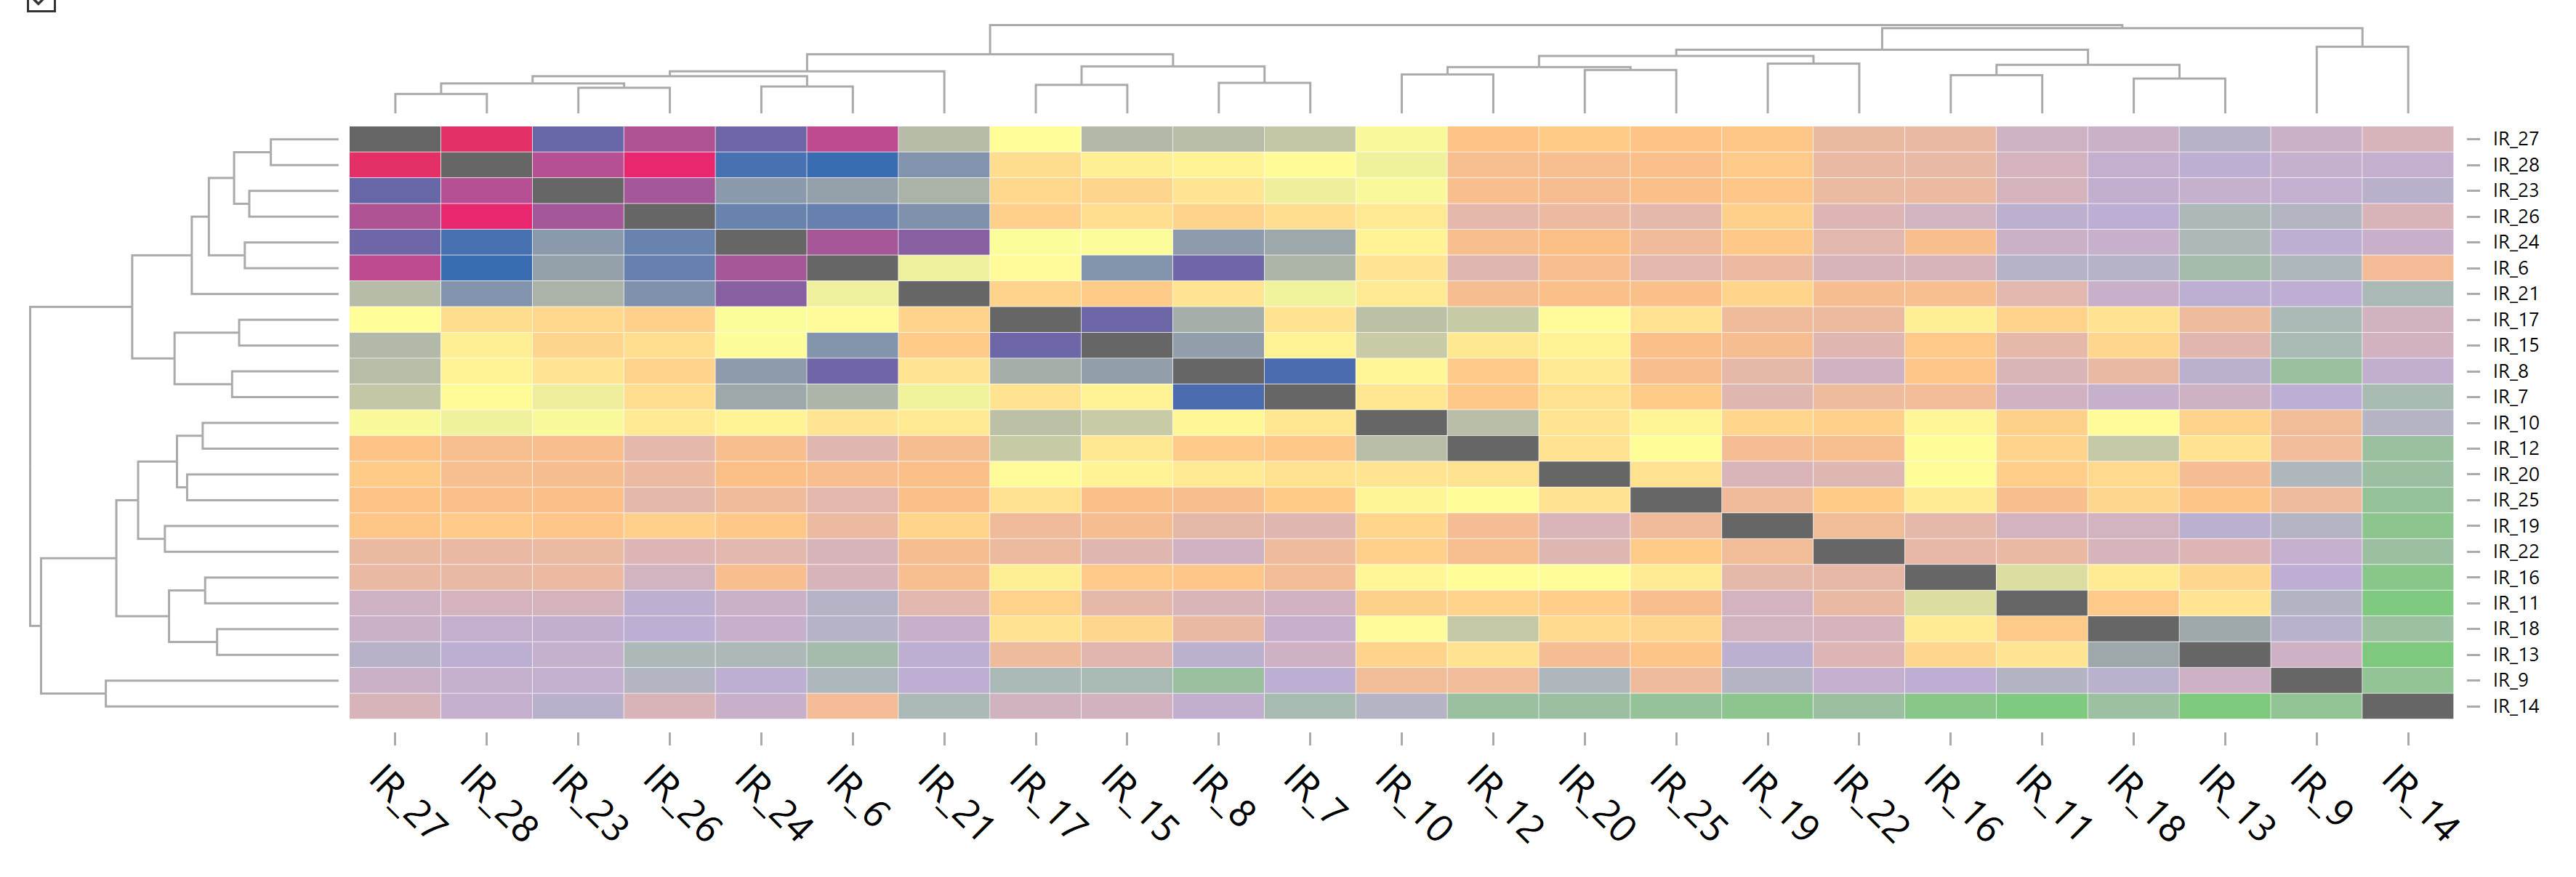


(c)
